# Supplementary material for: Role of Differentially Expressed Proteins in Acquired Resistance to Cdk4/6 Inhibitor in Breast Cancer
Source: Research Square preprint supplement (doi:10.21203/rs.3.rs-556331/v1), 2021-05-27
Supplement: Supplementary file 1 [file 192d5227e03a7bc50f40f115.docx]

**Supplementary Table - 1:** List of genes and their primer sequences*.

| **Gene Name** | **Primer’s Sequences** | **Sequence Id*** |
| --- | --- | --- |
| **ESR1** | **AAGTGCATGTTCCTGTTCTC** | | XM_017010377.1 | | --- | |  | |
| **GTGCTGTGCTGATATTTGGT** |
| **CDK4** | **TTGTCCCTTTCCCTACCTTT** | | NM_000075.3 | | --- | |  | |
| **CCCTTCTTCCAAGTGGTTTT** |
| **CDK6** | **AGCAGTGGTGAACTGAAAAG** | | NM_001145306.1 | | --- | |  | |
| **AACAGAAACTAGCAGGGACA** |
| **MDR1** | **ATCTTATGCTCTGGCCTTCT** | | AF016535.1 | | --- | |  | |
| **AGATGCCTGTCCAACACTAA** |
| **ABCG2** | **AGCACACAAAAGCCTACTCA** | | NM_001257386.2 | | --- | |  | |
| **CAGCAACAGAGGGAAATACA** |
| **BCL2** | **CGATCTGGAAATCCTCCTAA** | | XM_017025917.2 | | --- | |  | |
| **CCATCAATCTTCAGCACTCT** |
| **MCL1** | **GAGCTGGTTTGGCATATCTA** | NM_021960.4 |
| **GTCCAACTGCATAAACTGGT** |
| **Cyclin-D1** | **GGATGTTCATAAGGCCAGTA** | NM_053056.2 |
| **AAGGTTTGTGTGTGTGTGTG** |
| **CASP-3** | **GGCGTGTCATAAAATACCAG** | NM_004346.3 |
| **ACAAAGCGACTGGATGAA** |
| **BAX** | **CTTGGACTGTGTTTTTCCTC** | XM_017027077.1 |
| **TTTATTACCCCCTCAAGACC** |
| **BAD** | **GCCTATGCAAAAAGAGGAT** | NM_032989.2 |
| **GGAAAACCCAAAACTTCC** |
| **PARP1** | **GTTTTGTGTTGTGTCTGTGG** | NM_001618.3 |
| **GAATCTCTCTCCAGCCTTTT** |
| **18S** | **GCAATTATTCCCCATGAACG** | M10098.1 |
| **GGCCTCACTAAACCATCCAA** |

*All the Oligo-sequences are designed in Primer 3 tools by using the mRNA sequence obtained from NCBI site for the corresponding gene as mentioned the sequence Id.
